# Supplementary material
Source: publisher figshare collection journal article supplement (https://sage.figshare.com/ndownloader/files/21327744)
Supplement: Supplementary file 1 [file 21327744]

Supplemental file 4 Table. Correlation between potential preoperative predictive factors and postoperative nasality score

| Preoperative predictive factors | Correlation coefficient (r) |
| --- | --- |
| Age of primary repair | -0.0573 |
| Age of buccinators | 0.054 |
| Primary diagnosis | 0.215 |
| Number of previous secondary palate procedures | 0.348 |
| Hypernasality | 0.391 |
| Intelligibility | 0.524 |
| Velar movement | 0.006 |
| Lateral pharyngeal wall | 0.142 |
| Passavant’s ridge | 0.025 |
| Overall closure | 0.171 |
| Closure ratio | 0.181 |
| Resting velar length | -0.293 |
| Functional velar length | 0.045 |
| Velar thickness at rest | -0.095 |
| Velar sickness at contraction | 0.271 |
| Gap at rest | -0.303 |
| Gap at contraction | -0.319 |
